# Supplementary material
Source: PubMed Central journal article supplement (PMC2430905)

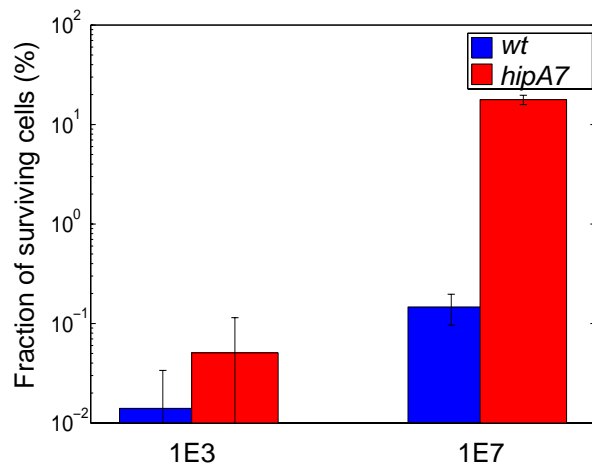

Supplement: pbio.0060120.sg001.pdf [file pbio.0060120.sg001.pdf]

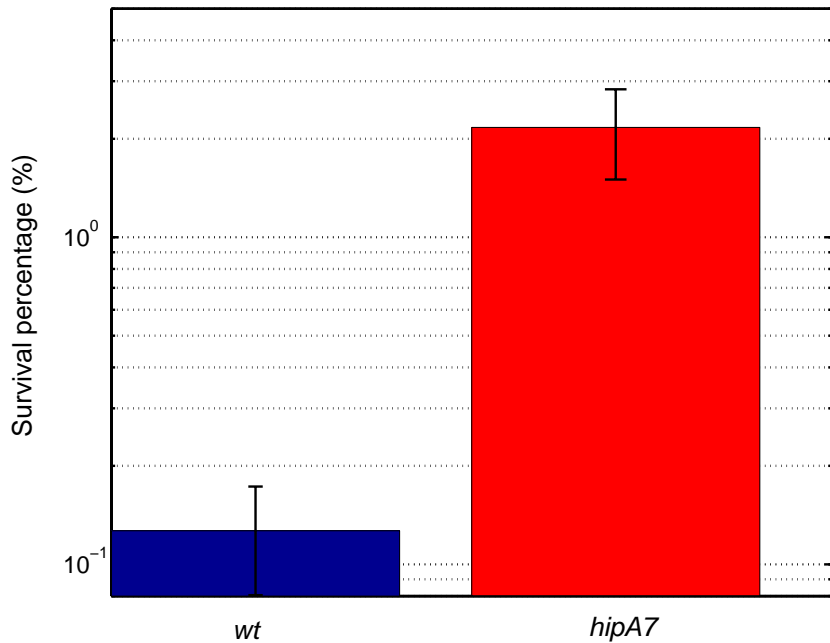

Supplement: pbio.0060120.sg002.pdf [file pbio.0060120.sg002.pdf]
